## 13 **Abstract**

14 Molecular dynamics (MD) has greatly contributed to understanding and predicting the way  
15 proteins fold. However, the time-scale and complexity of folding are not accessible via  
16 classical MD. Furthermore, efficient folding pipelines involving enhanced MD techniques  
17 are not routinely accessible. We aimed to determine whether perturbing the electrostatic  
18 component of the MD force field can help expedite folding simulations. We developed  
19 charge-perturbation dynamics (CPD), an MD-based simulation approach that involves  
20 periodically perturbing the atomic charges to values non-native to the MD force field. CPD  
21 obtains suitable sampling via multiple iterations in which a classical MD segment (with  
22 native charges) is followed by a very short segment of perturbed MD (using the same force  
23 field and conditions, but with non-native charges); subsequently, partially folded  
24 intermediates are refined via a longer segment of classical MD. Among the partially folded  
25 structures from low-energy regions of the free-energy landscape sampled, the lowest-  
26 energy conformer with high root-mean-square deviation to the starting structure and low  
27 radius of gyration is defined as the folded structure. Upon benchmark testing, we found  
28 that medium-length peptides such as an alanine-based pentadecapeptide, an amyloid- $\beta$   
29 peptide, and the tryptophan-cage mini-protein can fold starting from their extended linear  
30 structure in under 45 ns of CPD (total simulation time), versus over 100 ns of classical  
31 MD. CPD not only achieved folding close to the desired conformation but also sampled  
32 key intermediates along the folding pathway without prior knowledge of the folding  
33 mechanism or final folded structure. Our findings confirmed that perturbing the  
34 electrostatic component of the classical MD force field can help expedite folding

35 simulations without changing the MD algorithm or using expensive computing  
36 architectures. CPD can be employed to probe the folding dynamics of known, putative, or  
37 planned peptides, as well as to improve sampling in more advanced simulations or to guide  
38 further experiments.  
39

## 40 **Author summary**

41 Folding represents the process by which proteins assemble into biologically active  
42 conformations. While computational techniques such as molecular dynamics (MD) have  
43 provided invaluable insight into protein folding, efficient folding pipelines are not  
44 routinely accessible. In MD, the behavior of the studied molecule is simulated under the  
45 concerted action of multiple forces described by mathematical functions employing  
46 optimized parameters. Using non-native parameters effectively perturbs the MD force  
47 field. We show that this can be exploited to help expedite folding simulations. Specifically,  
48 we developed charge-perturbation dynamics (CPD), an MD-based simulation approach  
49 that involves periodically perturbing the force field by using non-native atomic charges.  
50 For folding medium-length peptides such as the tryptophan-cage mini-protein starting from  
51 the extended linear structure, CPD is much faster than other MD-based approaches while  
52 using the same software, hardware, and know-how required for running classical MD  
53 simulations. Furthermore, CPD not only achieves folding close to the desired conformation  
54 but also samples key intermediates along the folding pathway without prior knowledge of  
55 the folding mechanism or final folded structure. CPD can be employed to probe the folding  
56 dynamics of known, putative, or planned peptides, as well as to generate different  
57 conformations that can guide further experiments or more advanced simulations.

58

59

## 60 **Introduction**

61 Folding represents a complex phenomenon by which proteins assemble into biologically  
62 active conformations. Misfolding events can have detrimental and sometimes catastrophic  
63 effects on the ability of the protein to perform its function, on its distribution in various cell  
64 compartments, and on its recognition by other species<sup>1</sup>. Therefore, the study of protein  
65 folding, unfolding, and misfolding is critical to our understanding and manipulation of  
66 pathophysiological mechanisms and biotechnological processes<sup>2-4</sup>. Great advances in the  
67 field of in silico modelling, including molecular dynamics (MD), have helped understand  
68 important aspects of folding, such as the fact that protein-folding energy landscapes are  
69 funnel-shaped, or that proteins fold in units of secondary structures<sup>5-7</sup>.

70 MD, which simulates the behavior of a molecular system under the resultant action of a set  
71 of forces (i.e., force field), is a very popular computational approach to study protein  
72 dynamics, as it can provide information about folding and unfolding pathways, intra-  
73 protein interactions, intermediate and final structures, and timeline of folding events;  
74 however, the time-scale and complexity of folding are often not accessible via classical  
75 MD<sup>8,9</sup>. To address such limitations, enhanced MD techniques typically employ one or  
76 more of the following strategies: simplifying the representation of the protein structure<sup>10</sup>,  
77 constraining or restraining the simulation<sup>11</sup>, steering the simulation in a pre-specified  
78 direction<sup>12</sup>, enhancing the sampling of molecular conformations<sup>13</sup>, describing physical  
79 interactions more accurately<sup>14,15</sup>, and employing software and hardware platforms  
80 specifically dedicated to increasing the computational efficiency of MD calculations<sup>16</sup>. MD

81 platforms that can achieve millisecond timescales<sup>17,18</sup> are not routinely accessible, and thus  
82 most users still rely on local computational clusters, which typically do not have enough  
83 resources for efficiently folding small proteins. Moreover, the practical applicability of  
84 enhanced MD techniques is often limited to certain use cases (e.g., requiring a priori  
85 knowledge of the folded structure or of states along the folding pathway)<sup>8,19</sup>. Finally,  
86 setting up MD calculations that can make efficient use of such enhancement techniques  
87 represents a complex task, requiring advanced knowledge of modelling techniques.

88 In an effort to improve the availability of MD for investigations that involve protein  
89 folding or may benefit from information related to folding, we aimed to determine whether  
90 perturbing the electrostatic component of the classical MD force field can help promote  
91 folding on shorter time scales while using the same software, hardware, and know-how  
92 required for running classical MD simulations. To test this hypothesis, we developed an  
93 MD technique that relies on classical MD but includes short segments where the  
94 electrostatic component of the force field is heavily perturbed. We refer to this technique  
95 as charge-perturbation dynamics (CPD), although the perturbed component is modelled in  
96 the same way as the classical electrostatic component. We here describe the main  
97 principles of CPD and the results of a benchmark test for the folding of medium-length  
98 peptides. We compare the speed and accuracy of CPD with those of classical MD, and  
99 further compare the CPD folding results with those from independent studies that apply  
100 more complex methods and more expensive computational resources to fold the same  
101 peptides. While peptide folding simulations typically require at least hundreds of ns, we  
102 show that medium-length peptides can fold via CPD starting from their extended linear

103 structure in under 45 ns (total simulation time), without any prior knowledge of the folding  
104 mechanism or final folded structure, and using the same software, hardware, and know-  
105 how required for running classical MD simulations.

106

## 107 **Results**

### 108 *Principles of CPD*

109 MD simulations describe the behavior of molecular systems under the influence of the  
110 force field. Various force fields have been proposed to date<sup>20,21</sup>. Commonly used force  
111 fields use approximate functions to describe the contributions of bonded interactions (e.g.,  
112 torsion) and non-bonded interactions (e.g., electrostatic). Point charges residing at the  
113 position of each atom (i.e., atomic charges) are commonly used as parameters in the  
114 calculation of the electrostatic component. Because the concept of atomic charge  
115 represents a very crude approximation of electron density, there is no universally accepted  
116 quantitative definition of atomic charge. Current approaches for the calculation of atomic  
117 charges partition the molecular electron density obtained from quantum mechanical  
118 calculations (e.g., see Lee et al.<sup>22</sup>). However, such quantum mechanics-based approaches  
119 are rarely used in MD; instead, empirical, force field-specific approaches are typically  
120 applied, as they provide both speed and adaptability for the force field<sup>23</sup>. In fact, force-field  
121 parameters including atomic charges are optimized in an inter-dependent manner in a  
122 process known as force-field parameterization<sup>24,25</sup>, so that the overall force field may  
123 provide a reasonable description of the studied system (e.g., density at room temperature).

124 Using non-native or even suboptimal parameters effectively perturbs the MD force field.  
125 We show that this characteristic can be exploited to help expedite folding simulations.  
126 The concept underlying CPD is that substantial conformational changes can be promoted  
127 during the MD simulation by perturbing the electrostatic component of the force field over  
128 brief segments of the simulation. Within CPD, the electrostatic component is perturbed by  
129 replacing the atomic charges native to the force field (i.e., the type of atomic charges used  
130 during force field parameterization) with non-native values. Specifically, the classical MD  
131 simulation (i.e., the MD simulation using native charges) is periodically intercalated with  
132 brief segments where non-native charges are used. The classical MD segments optimize  
133 the interactions within the secondary structure elements, while the perturbed MD segments  
134 allow these elements to reposition themselves relative to one another. This approach  
135 ultimately facilitates folding over a much shorter time scale, and thus requires significantly  
136 fewer computational resources than those necessary for folding using currently available  
137 techniques.

### 138 ***Benchmarking a CPD protocol***

139 To examine whether CPD can help expedite folding simulations, we implemented the  
140 above-described principles into a simple pipeline covering 45 ns of simulation time (Fig  
141 1). The CPD protocol used in this study had two main stages: one focused on obtaining  
142 suitable sampling, and one focused on identifying and refining the folded structure. The  
143 detailed description of the pipeline is as follows, with the values in parentheses  
144 representing the exact settings used in the benchmark. Within stage I, the starting structure  
145 (a linear chain of amino acid residues) is minimized and equilibrated (1 ns). Subsequently,



146 a segment of classical MD is run (400 ps), with snapshots taken at short intervals (4 ps).  
147 Thereafter, a brief segment (100 ps) of perturbed MD is run, during which the atomic  
148 charges native to the force field are replaced by non-native charges (conformation-  
149 dependent atomic charges obtained via an electronegativity equalization method)<sup>26,27</sup>. At  
150 the end of the perturbed MD segment, the secondary structure content is estimated for each  
151 snapshot recorded during this short segment, and the snapshot with the highest content of  
152 secondary structure is then used as the first frame of the subsequent classical MD segment.  
153 This sequence of steps consisting of a segment of classical MD, a segment of perturbed  
154 MD, and evaluation of secondary structure is iterated several times (50 times), giving a  
155 total simulation time of several tens of ns (25 ns) for stage I. Stage II follows, wherein a  
156 free-energy landscape is plotted based on two key measures calculated from each snapshot  
157 sampled in stage I, namely the root mean square deviation (RMSD) to the starting  
158 structure, and the radius of gyration (Rg). Since the starting structure was linear, the free-  
159 energy landscape built in this manner allows to identify partially folded structures in the  
160 low-energy regions, as such conformers are expected to have high RMSD and low Rg as  
161 indicators of folding<sup>28</sup>. Once the stage I snapshot with the lowest energy is identified, it  
162 serves as the initial structure for a longer segment of classical MD (20 ns), which  
163 represents stage II, with snapshots recorded at short intervals (4 ps). Finally, the overall  
164 free-energy landscape is built based on RMSD and Rg obtained from all snapshots (i.e.,  
165 stage I and stage II). The lowest energy structure is provided as the final, folded structure.  
166 A detailed pseudocode of this protocol is available in the S1 Appendix and describes the  
167 setting up, running, and evaluating the results of the MD simulations.

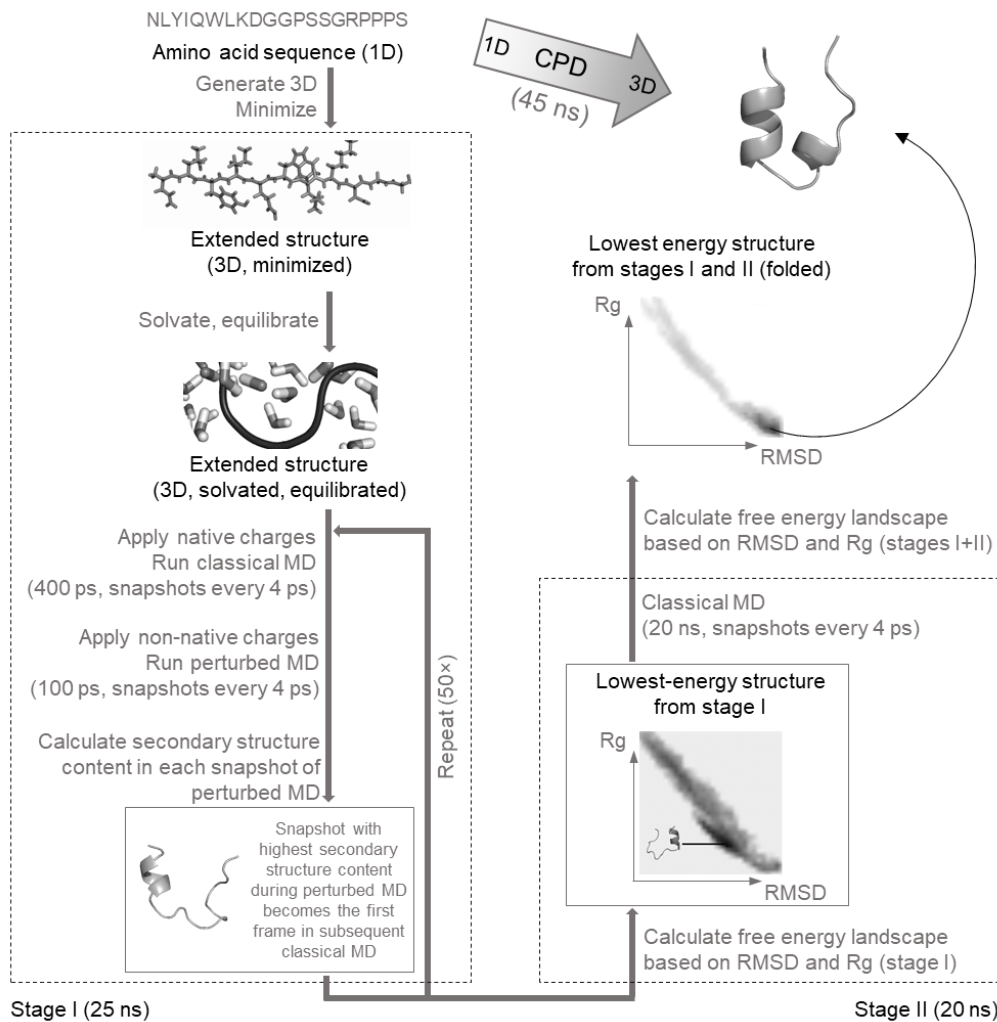

168 **Fig 1. Schematic diagram of a charge-perturbation dynamics (CPD) protocol for**  
 169 **expediting molecular dynamics (MD)-based folding simulations.** CPD integrates  
 170 segments of classical molecular dynamics (MD) with segments of perturbed MD, where  
 171 the atomic charges native to the force field are replaced with non-native charges, resulting  
 172 in a perturbation of the electrostatic component of the force field. The information  
 173 provided in parentheses refers to the settings used in the present benchmark. All  
 174 simulations started from the amino acid sequence. Stage I, which is focused on obtaining  
 175 suitable sampling, consists of an initial step of minimization, solvation, and equilibration  
 176 of the extended linear structure, followed by a set of alternating segments of classical and  
 177 perturbed MD. With the exception of the very first segment of classical MD, the initial  
 178 structure for each segment of classical MD corresponds to the snapshot with the highest  
 179 content of secondary structure sampled in the preceding segment of perturbed MD. Stage II  
 180 is concerned with identifying and refining the partially folded structure sampled in stage I.  
 181 A free-energy landscape is plotted based on indicators of folding computed from the  
 182 snapshots recorded in stage I, namely the radius of gyration (Rg) and the root mean square  
 183 deviation (RMSD) relative to the minimized linear structure. A snapshot with the lowest

184 energy from a region with high RMSD and low Rg is used as the initial frame in a final  
185 segment of classical MD. The overall free-energy landscape is built using snapshots from  
186 stage I and stage II, and the lowest-energy structure is extracted as the final folded  
187 structure.  
188

189 Such a CPD protocol totaling 45 ns of simulation time was benchmarked against classical  
190 MD totaling 100 ns in terms of the ability to fold medium-length peptides commonly used  
191 for benchmarking protein folding techniques. All simulations started from the extended  
192 linear structure. In each case, triplicate simulations were run with different starting  
193 velocities, to verify that rapid folding is not a random event. The best results are shown in  
194 Fig 2, while the complete results are provided in S1 Fig and S2 Fig for CPD and classical  
195 MD, respectively.

### 196 *Folding the tryptophan cage (Trp-cage) in 45 ns of simulation time*

197 The Trp-cage is an engineered mini-protein containing 20 amino acid residues  
198 (NLYIQWLKDGGPSSGRPPPS). The Trp-cage is often used in folding studies because it  
199 folds fast and because it is well studied both experimentally and theoretically. The Trp-  
200 cage consists of an N-terminal  $\alpha$ -helix (residues 2–8), followed by a  $3_{10}$ -helix (residues 11–  
201 14) (Fig 2B and 2C). Folding is cooperative and hydrophobically driven by the  
202 encapsulation of a Trp side-chain in a sheath of Pro rings (Fig 2C, top)<sup>29</sup>. Specifically,  
203 folding relies on the formation of a hydrophobic core in which Trp6 is buried in the center  
204 by residues Pro12, Pro17, Pro18, and Pro19<sup>30</sup>.

205 **Fig 2. Benchmarking a charge-perturbation dynamics (CPD, 45 ns) protocol against**  
206 **classical molecular dynamics (MD, 100 ns) for folding medium-sized peptides.** CPD,  
207 which consisted of two stages, achieved rapid folding of the tryptophan-cage mini-protein  
208 (Trp-cage), amyloid- $\beta$  peptide A $\beta$ 17-34, and alanine-based pentadecapeptide (AAQAA)<sub>3</sub>.  
209 All simulations were run in triplicate, with different starting velocities for the atoms. Only

210 the results of the best-performing runs are given here, whereas the complete results are  
 211 available in S1 Fig and S2 Fig. (A) Formation of secondary-structure elements over the  
 212 course of 45 ns of CPD (left column) and 100 ns of classical MD (right column). (B) Free-  
 213 energy landscapes and lowest-energy structures obtained following 45 ns of CPD (top  
 214 lane) and 100 ns of classical MD (bottom lane). The reference folded structures are also  
 215 shown for comparison. The RMSD against the starting structure (linear) was used for  
 216 detecting the lowest-energy structures. The RMSD against the reference structure is shown  
 217 for comparison but was not used in during the simulation. (C) Detailed comparison of the  
 218 hydrophobic core in the folded Trp-cage (reference, top; best CPD, bottom).  
 219 Abbreviations: Rg, radius of gyration; RMSD, root mean square deviation.

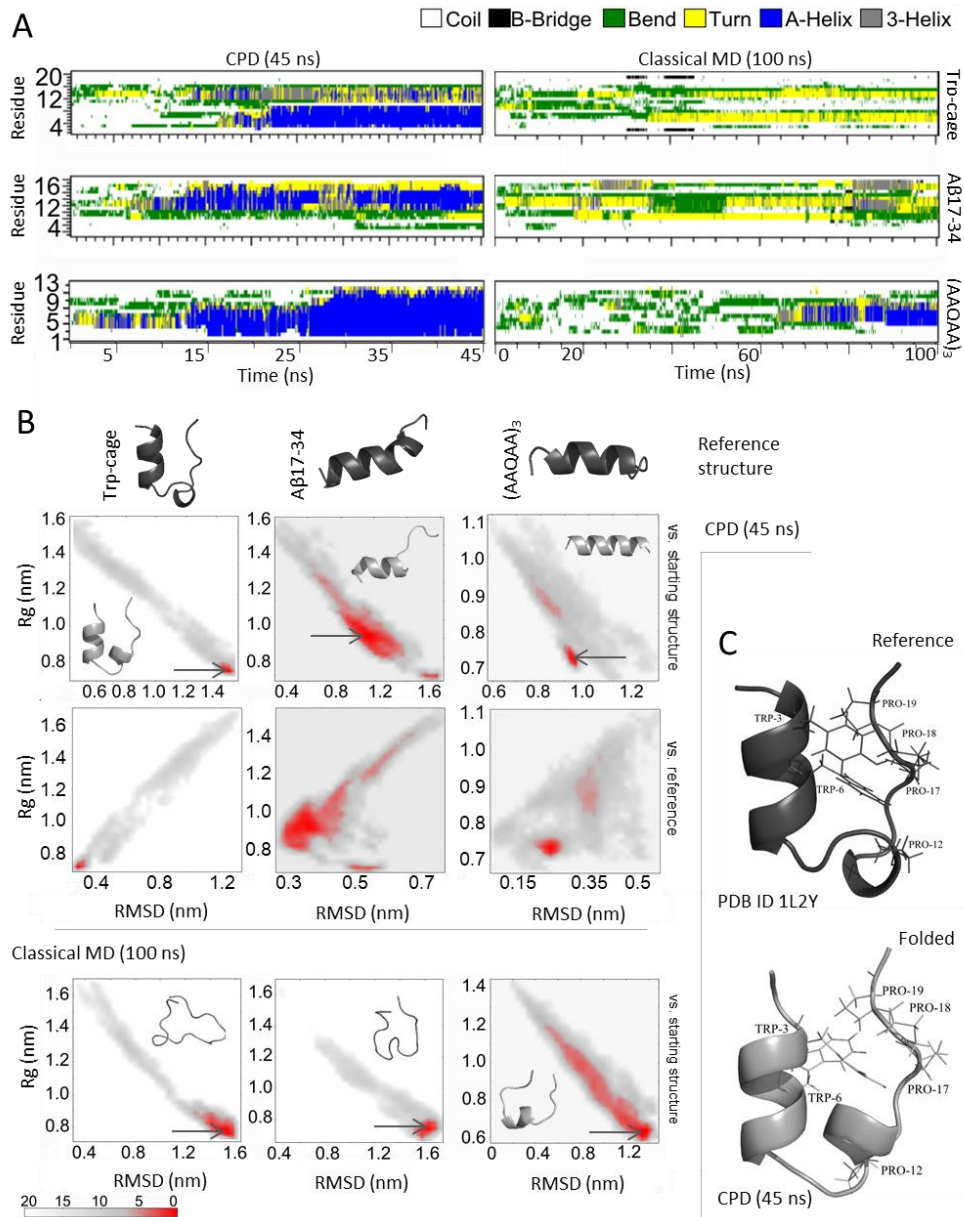

220

221 We subjected the linear extended structure of the Trp-cage to the CPD simulation protocol.  
222 Secondary structure elements formed already during stage I of the simulation, and the  
223 expected  $\alpha$ -helix and  $3_{10}$ -helix were stable throughout stage II (Fig 2A). In agreement with  
224 experimental findings, we found that the formation of the cage depends on the formation of  
225 the  $\alpha$ -helix (i.e., the  $\alpha$ -helix forms first), whereas the  $3_{10}$ -helix is less stable and likely to  
226 unfold before the rest of the structure under temperature stress<sup>31</sup>. The final folded structure  
227 (Fig 2B and 2C) was within 2.86 Å (backbone RMSD) of the reference folded Trp-cage  
228 (PDB ID 1L2Y)<sup>29</sup>. Since the pairwise RMSD values for reported NMR models of the Trp-  
229 cage (i.e., those included in PDB ID 1L2Y) range from 0.54 Å to 1.39 Å, it can be  
230 considered that the differences between the reference folded structure and the structure  
231 folded via CPD are most likely related to force field-specific limitations<sup>32</sup>. In the CPD-  
232 folded structure, the hydrophobic core is present, with Trp6 at its center, packed by  
233 hydrophobic residues including Pro and Tyr (Fig 2C, bottom). The specific Trp6  
234 interactions are similar to those reported in previous simulations<sup>30</sup>, but different than those  
235 in the reference folded structure reported based on NMR findings (Fig 2C, top)<sup>29</sup>.  
236 Nevertheless, mutational studies have shown that non-specific indole/backbone  
237 interactions might be more relevant for folding than specific indole-proline interactions<sup>33</sup>.  
238 In one of the CPD runs, the Trp3 side chain is not closely packed with the central Trp6, but  
239 fully exposed (see S1 Fig). This feature was previously reported in simulations using  
240 completely different setups than our own<sup>32</sup>. Furthermore, the final folded structure from  
241 the CPD run does not exhibit the salt-bridge between Asp9 and Arg16, which appears in

242 the reference folded structure<sup>29</sup>. The formation of this salt bridge and its role in the stability  
243 of the Trp-cage structure are somewhat controversial. Some have speculated that this salt  
244 bridge enables fast folding and contributes to the stability of the folded structure<sup>29,32,34</sup>,  
245 while others claimed that the fully folded state can be obtained only after breaking of the  
246 salt bridge<sup>30,35</sup>, or that the salt bridge is not required at all for folding<sup>36-38</sup>. Thus, the CPD-  
247 folded structure of the Trp-cage is considered to be sufficiently close to the native state.  
248 By comparison, the classical MD simulation starting from the extended structure of the  
249 Trp-cage did not show formation of any significant helical element even after 100 ns (Fig  
250 2A). The only interesting feature of the classical MD simulations was that the N-terminal  
251 residues occasionally assembled into a short-lived  $3_{10}$ -helix.

### 252 *Folding a water-soluble amyloid- $\beta$ (A $\beta$ ) peptide in 45 ns of simulation time*

253 The folding of the A $\beta$  peptide and various A $\beta$  segments has been the topic of intense study  
254 because of its association with the progression of Alzheimer's disease<sup>39</sup>. The water soluble  
255 A $\beta$ 17-34 is an 18-residue (LVFFAEDVGSNKGAIIGL) segment of A $\beta$ , which, in aqueous  
256 solutions under physiological conditions, was observed to adopt an  $\alpha$ -helical structure for  
257 residues 19–26 and 28–33, with a kink around residues 26–28 (Fig 2B)<sup>40</sup>.

258 We subjected the linear extended structure of A $\beta$ 17-34 to the CPD simulation protocol.  
259 Already during stage I, we observed the formation of an  $\alpha$ -helical element in the second  
260 half of A $\beta$ 17-34, along with the expected kink. Stage II sampled the full length of the  $\alpha$ -  
261 helix between residues 28 and 33, and the kink at the expected position between residues  
262 26 and 27 (Fig 2A). Interestingly, an intermediate with  $3_{10}$ -helical structure between  
263 residues 25 and 33 was sampled to a significant extent. This observation is in agreement

264 with a report based on a completely different simulation setup, where a similar  
265 intermediate with  $3_{10}$ -helical structure between residues 26 and 28 was sampled in A $\beta$ 21-  
266 30<sup>41</sup>. The final CPD-folded structure does not exhibit a well-defined  $\alpha$ -helical structure  
267 prior to the kink (residues 19–26) (Fig 2B) but is within 3.42 Å (backbone RMSD) of the  
268 reference folded structure of A $\beta$ 17-34 (PDB ID 2MJ1)<sup>40</sup>. It is worth noting here that the  
269 reference folded structures from the NMR ensemble differ from one another by up to 2.79  
270 Å. Moreover, in the NMR experiment, the A $\beta$ 17-34 contained two additional glutamic acid  
271 residues at each terminus, which increased solubility and stabilized the helical structure in  
272 aqueous solution<sup>40</sup>; since our simulations only included residues 17–34 (i.e., without the  
273 terminal residues added to stabilize the helix), we consider that CPD achieved a  
274 satisfactory proportion of helical structure.

275 By comparison, the classical MD simulation starting from the extended structure of A $\beta$ 17-  
276 34 showed formation of significant helical elements only after 80 ns, but these were stable  
277 only for approximately 10 ns (Fig 2A). An interesting feature of the classical MD  
278 simulation was that the  $3_{10}$ -helical elements seemed to be more stable than the  $\alpha$ -helical  
279 elements.

### 280 ***Folding an alanine-based decapentapeptide in 45 ns of simulation time***

281 Alanine-based peptides adopt significant populations of helical structures in aqueous  
282 solution<sup>42</sup>. The alanine-based decapentapeptide (AAQAA)<sub>3</sub> was shown experimentally to  
283 exhibit significant helical content<sup>43</sup>. Successful simulations of the folding of (AAQAA)<sub>3</sub>  
284 have relied on an accurate description of interactions<sup>44</sup> or employed enhanced sampling  
285 techniques<sup>45,46</sup>.

286 We subjected the linear extended structure of (AAQAA)<sub>3</sub> to the CPD simulation protocol.  
287 Helical segments formed already during stage I and were amply sampled in stage II (Fig  
288 2A). Since no experimental structure has been published for (AAQAA)<sub>3</sub> to date, we used  
289 as reference the latest folded structure reported for (AAQAA)<sub>3</sub><sup>47</sup>. The final CPD-folded  
290 structure was within 2.53 Å (backbone RMSD) of the reference. Interestingly, stage II also  
291 sampled 3<sub>10</sub>-helical elements, in agreement with the suggestion that such elements appear  
292 as intermediates during folding<sup>48,49</sup>.  
293 By comparison, the classical MD simulation starting from the extended structure of  
294 (AAQAA)<sub>3</sub> showed formation of a stable  $\alpha$ -helical element in the central part of the  
295 peptide only after 70 ns. However, the folding did not progress significantly during the  
296 following (and final) 30 ns.

297

## 298 **Discussion**

299 The aim of the current study was to determine whether perturbing the electrostatic  
300 component of the MD force field can help expedite MD-based folding simulations. We  
301 proposed and successfully validated a simple CPD protocol for rapidly folding medium-  
302 sized peptides. We further discuss key aspects of the CPD framework.

### 303 ***Role of charge perturbation***

304 In principle, any charge calculation scheme can be used for generating the non-native  
305 charges used in the perturbed MD segments, even if the representation of electrostatic  
306 interactions may be less accurate. To illustrate this fact, we repeated the CPD protocol



307 using Gasteiger-Marsili charges (without pi contribution<sup>50</sup>, as implemented in Open  
308 Babel<sup>51</sup>) as non-native charges, and successfully folded (AAQAA)<sub>3</sub> starting from its linear  
309 structure (S3 Fig). The key difference between the force field-native charges and EEM  
310 charges is related to conformational dependence (e.g., side-chain flipping is reflected in  
311 EEM charges) and inter-residue charge transfer (i.e., residues will have non-integer charge  
312 according to EEM). Despite the fact that Gasteiger-Marsili charges provide a more limited  
313 description of the electron density distribution, they can be used to perturb an MD force  
314 field that was optimized to work with other types of charges.  
315 Perturbing the atomic charges results in perturbing an isolated component of the forces,  
316 which is, in essence, similar to effect of enhanced MD strategies such as Hamiltonian  
317 replica exchange<sup>52</sup>. Another similarity is that multiple simulations are run using different  
318 energy functions, especially if the non-native atomic charges depend on the molecular  
319 conformation (i.e., each perturbed segment will use different forces). However, unlike  
320 replica-exchange MD, CPD uses sequential rather than parallel simulations.

### 321 ***Role of the force field***

322 The use of a certain force field can be critical for obtaining correct results. For example,  
323 ff03, which is the force field used in our calculations, is known to overstabilize helices<sup>53</sup>.  
324 To determine whether CPD can help expedite folding even when using a force field that  
325 does not have such a bias, we have repeated the CPD protocol using ff99sb-star-ildnp<sup>54</sup>,  
326 which belongs to the ff99sb family of force fields, known to underestimate the formation  
327 of helices<sup>53</sup>. Using the CPD protocol with ff99sb-star-ildnp, we successfully folded  
328 (AAQAA)<sub>3</sub> starting from its linear structure (S4 Fig). Importantly, the final folded

329 structure obtained using CPD with ff99sb-star-ildnp is less helical than that obtained using  
330 ff03, and more similar to the reference structure (backbone RMSD, 1.21 Å for ff99sb-star-  
331 ildnp vs. 1.98 Å for ff03) obtained by Beauchamp et al.<sup>47</sup>, who also used ff99sb-ildn force  
332 fields with side chain and backbone torsion modifications (ff99sb-ildn-phi and ff99sb-ildn-  
333 NMR, respectively). For comparison, classical MD using the same force field did not  
334 achieve folding within the same simulation time (S4 Fig).

335 Similarly, whether or not non-helical structures can be folded using CPD depends mostly  
336 on the force field itself. For example, MD-based studies reported that the force field  
337 OPLS-AA can be used to fold the tryptophan zipper (trpzip), a peptide motif that adopts  
338 beta-hairpin conformation<sup>55-57</sup>. To determine whether CPD can help expedite the folding of  
339 not only helical but also beta-hairpin peptides, we applied the CPD protocol to fold trpzip  
340 (PDB ID: 1LE0) starting from the extended structure. For this purpose, we used the OPLS-  
341 AA force field. The results (S4 Fig) confirmed that CPD can indeed expedite folding of  
342 beta-hairpin peptides provided that the force field is capable of stabilizing such secondary  
343 structure elements. Taken together, these observations indicate that the force field is the  
344 main determinant of folding effectiveness, whereas charge perturbation is a determinant of  
345 folding efficiency.

#### 346 *Advantages of CPD*

347 We designed CPD aiming to expedite MD-based folding simulations without requiring  
348 additional computational resources or expert knowledge. Benchmarking revealed that CPD  
349 allows folding of medium-length peptides using the same software, hardware, and know-  
350 how required for running classical MD simulations, but less computational time (from the

351 linear extended structure in 45 ns of simulation time). Fast-folding peptides are typically  
352 examined using at least several hundred ns of simulation time (e.g., by running several  
353 replicas, each totaling tens of ns) and often require applying complex techniques to  
354 enhance conformational sampling<sup>58</sup>.

355 One of the few studies that used extended structures as the starting point of the simulation  
356 was performed by Mou et al.<sup>30</sup>, who developed and implemented a new version of the  
357 AMBER force field, employed a complex equilibration procedure, and performed a  
358 simulation consisting of 12 temperature-specific replica runs of 160 ns each and 2 classical  
359 runs of 500 ns each (totaling ~3  $\mu$ s), followed by an extensive cluster analysis with the aim  
360 to fold the Trp-cage and examine the folding dynamics. Their best structure had a  
361 backbone RMSD of 1.1 Å relative to the reference structure with PDB ID 1L2Y, which is  
362 the same as the reference structure used in our present study. The same authors obtained  
363 three low-energy basins (best RMSD between 1 and 4 Å) that correspond well to the  
364 folded structures obtained using CPD in our study. Similarly, Kannan and Zacharias<sup>58,59</sup>  
365 successfully folded the Trp-cage (best RMSD, ~2 Å) from the linear structure by  
366 employing biasing potential replica-exchange MD (5 replicas  $\times$  70 ns = 350 ns of total  
367 simulation time). The same authors later showed that the Trp-cage can also fold from the  
368 extended structure in 500 ns of classical MD using various force fields, but with poorer  
369 results (C-alpha RMSD  $>3$  Å)<sup>38</sup>. For comparison, CPD provided a backbone RMSD of  
370 2.86 Å after only 45 ns of total simulation time using a standard force field available in any  
371 MD program. Moreover, our short, basic simulation at a single temperature was also able  
372 to sample characteristic folding features detected in the complex study by Mou et al.<sup>30</sup>,

373 such as the fact that the Trp-cage first adopts a U-shape, then forms the  $\alpha$ -helical stretch,  
374 and only afterwards forms the  $3_{10}$ -helix.

375 Another study that used extended structures as starting structures was performed by Lee et  
376 al.<sup>60</sup>, who successfully folded Trpzip2 (PDBID: 1LE1; best RMSD, 2.3 Å) and (AAQAA)<sub>3</sub>  
377 by employing a combination of temperature and Hamiltonian replica-exchange MD (16  
378 replicas  $\times$  200 ns = 3.2  $\mu$ s of total simulation time) using ff96 and implicit solvent. Their  
379 simulations provide several low-energy basins that correspond well to the folded structures  
380 we obtained using only 45 ns of CPD.

381 Therefore, while the CPD-based description of the folding dynamics is relatively crude and  
382 CPD is not meant to replace long simulations with enhanced sampling, CPD represents an  
383 inexpensive yet powerful approach for probing folding dynamics and generating relevant  
384 three-dimensional conformations of small proteins based only on information regarding the  
385 amino acid sequence.

386 The literature contains a large and heterogeneous body of computational studies on the  
387 folding of the three peptides discussed in our paper. Given that folding for such systems  
388 often takes place on a  $\mu$ s time-scale, many studies were successful at modelling folding  
389 pathways precisely because they achieved such time-scales (e.g., as did Lindorff-Larsen et  
390 al.<sup>17</sup>). In this context, we conclude that, since CPD allows to fold medium-sized peptides in  
391 under 45 ns of simulation time, it is at least one order of magnitude faster than any  
392 currently available alternative based on MD. Moreover, CPD is applicable to any class of  
393 molecules and can be incorporated into any simulation setup, regardless of force field,  
394 treatment of solvent, and other methodological aspects. However, the exact CPD protocol

395 should be optimized for specific cases (e.g., by varying the length and frequency of the  
396 perturbed MD segments, as well as the type of non-native charges). Finally, CPD does not  
397 require a new MD implementation and can be immediately adopted in practice with any  
398 MD program.

399 Importantly, the computational requirements for CPD do not differ from those of classical  
400 MD, whereas other enhanced MD simulations are more difficult to set up for inexperienced  
401 users and typically require above-average computational resources. For example, if a  
402 system requires 12 cores (with certain minimal specifications) to run classical MD, the  
403 same 12 cores will be sufficient for CPD, whereas at least  $n \times 12$  cores will be required  
404 simultaneously to run replica-exchange MD (where  $n$  is the number of replicas), regardless  
405 of how much simulation time is covered. The additional CPD step of atomic charge  
406 calculation has no effect on the complexity of the calculation, on the required architecture,  
407 or on the overall duration of the calculation (i.e., CPU hours). The only determinant of  
408 speed is the force field implementation and simulation setup (e.g., all-atom vs. coarse-  
409 grained representation, treatment of electrostatics, water model), as well as the available  
410 hardware (e.g., using CUDA acceleration on machines with GPU). These aspects will  
411 influence the real-time speed of the calculation (ns/day) regardless of the type of  
412 conformational sampling used (classical MD, replica-exchange MD, CPD, etc.).

413 Furthermore, the nature of the speed enhancement due to improved conformational  
414 sampling is important. For example, replica-exchange MD not only helps detect and  
415 promote relevant conformers but typically covers more simulation time in less real time by  
416 increasing CPU time, provided that sufficient computational power is available. On the

417 other hand, CPD helps achieve folding within a short simulation time, which automatically  
418 reduces both the CPU time and the real time required for simulations, and moreover does  
419 not require additional computational resources. To summarize, CPD is accessible to any  
420 user who can run classical MD.

#### 421 ***Limitations***

422 Several limitations should be considered. First, CPD is limited in its description of the  
423 folding dynamics. For example, although folding close to a biologically active  
424 conformation can be achieved, such simulations do not necessarily provide the natural  
425 folding pathway. Additional limitations are related to the force field itself, which may  
426 induce bias towards certain arrangements<sup>47,61</sup>. Moreover, different force fields integrate  
427 atomic charge parameters differently, and therefore their sensitivity to perturbation may  
428 also differ. Further study is warranted to develop force field-specific CPD protocols that  
429 provide efficient folding of small proteins by taking advantage of the particular strengths  
430 and weaknesses of each force field, especially in the context of a certain combination of  
431 force field, water model, and treatment of electrostatic interactions. These aspects are  
432 particularly important when studying molecules with reduced secondary structure content  
433 even in the folded state.

434 It should be noted that, while CPD is a fast alternative to other MD-based techniques, it is  
435 more time demanding than fundamentally different approaches to folding, such as those  
436 based on Hidden Markov Models. The web server PEP-FOLD is a great example of a  
437 widely available tool for rapid prediction of peptide structure starting only from sequence  
438 information<sup>62</sup>. On the other hand, non-MD folding approaches provide only the folded

439 structure, while CPD also produces a free-energy profile where transitions of interest can  
440 be further studied; moreover, CPD can be used as a conformer generation tool in the  
441 computational study of peptides via chemoinformatics or molecular simulation techniques;  
442 finally, CPD caters to a wider MD community because it uses common force fields and  
443 samples conformations compatible with such force fields, allowing integration with MD  
444 pipelines.

#### 445 ***Conclusion***

446 In MD, the behavior of the studied molecule is simulated under the concerted action of a  
447 set of forces described using specific mathematical functions with optimized parameters.  
448 Using non-native parameters effectively perturbs the MD force field. We showed that this  
449 characteristic can be exploited to help expedite folding simulations. In particular, we  
450 confirmed that perturbing the electrostatic component of the MD force field can help  
451 expedite the folding of medium-length peptides, with successful sampling of important  
452 intermediates, using the same software, hardware, and know-how required for running  
453 classical (unperturbed) MD simulations. While CPD does not provide an exact description  
454 of the natural folding dynamics, it offers certain important advantages over currently  
455 available MD techniques in addition to improving sampling: no prior knowledge of the  
456 folded or unfolded states is required; there is no need to change the code or settings for  
457 classical MD; the perturbation can be achieved using freely available software; regarding  
458 computational requirements, CPD is accessible to any user who can run classical MD.  
459 CPD can be employed to probe the folding dynamics of known, putative, or planned

460 peptides, as well as to improve sampling in more advanced simulations or to guide further  
461 experiments.

## 462 **Methods**

### 463 *Simulation setup*

464 All MD simulations used for benchmarking followed the same protocol and were  
465 performed using the GROMACS package<sup>63</sup>. The extended structures used as starting  
466 points in each simulation were generated using the AMBER package<sup>64</sup>. The starting  
467 structures were placed in a cubic simulation box using the ff03 force field<sup>65</sup>, in such a way  
468 that the distance from the solute to any edge of the simulation box was at least 1.5 nm. All  
469 bonds were constrained using the linear constraint solver algorithm<sup>66</sup>. Electrostatic and van  
470 der Waals interactions were treated via the particle mesh Ewald method<sup>67</sup>, with cubic  
471 interpolation and grid spacing of 0.16 nm (or auto-detected when using GPU). The  
472 distance for the Coulomb cut-off was 1 nm, and the distance for the Lennard-Jones cut-off  
473 was 1 nm (both default values enabling calculations on GPU). The temperature was  
474 maintained at 300 K using the v-rescale thermostat<sup>68</sup> with a time constant of 0.1 ps, and  
475 Parrinello-Rahman pressure coupling was used<sup>69</sup>, with a time constant of 2.0 ps. The  
476 starting structures were energy minimized using steepest decent and equilibrated for 1 ns.  
477 The Leap frog algorithm was used for integrating Newton's equation of motion, with a time  
478 step of 2 fs. In CPD, stage I consisted of 50 iterations, each made up of 400 ps of classical  
479 MD plus 100 ps of perturbed MD, giving a total simulation time of 25 ns. Stage II  
480 consisted of 20 ns of classical MD. Fully classical MD simulations were run for 100 ns,



481 using only charges native to the force field. Snapshots were taken every 4 ps. All  
482 simulations were run in triplicate, with different starting velocities for the atoms.  
483 Secondary structure content was evaluated using DSSP<sup>70</sup> in GROMACS. In each iteration  
484 of stage I, the classical MD segment was started from the snapshot with the highest content  
485 of secondary structure sampled during the preceding segment of perturbed MD; if no  
486 suitable structure could be identified (i.e., no residues were involved in a secondary  
487 structure element), the last snapshot of the perturbed MD segment was used as a starting  
488 frame for the subsequent segment of classical MD. Before starting perturbed MD, the  
489 native charges from the topology file were replaced with non-native charges, which were  
490 computed using the Electronegativity Equalization Method<sup>26</sup> implemented in ACC<sup>71</sup>. In the  
491 ACC calculation, the total charge was +1 e, -1 e, and 0 e for the Trp-cage, A $\beta$ 17-34, and  
492 (AAQAA)<sub>3</sub>, respectively; no solvent was included in the ACC calculation; the parameter  
493 set EX-NPA\_6-31Gd\_PCM was used<sup>27</sup>, and the option Full EEM was chosen.

#### 494 *Evaluating the folding*

495 The secondary structure elements, RMSD, Rg, and free energy were computed within  
496 GROMACS using the options do\_dssp, g\_rms, g\_gyrate, and g\_sham, respectively. These  
497 steps and settings are included in the pseudocode described in the S1 Appendix. The  
498 reference folded structures of the Trp-cage and A $\beta$ 17-34 were taken from the Protein Data  
499 Bank (PDB IDs 1L2Y and 2MJ1, respectively), and the RMSD values are given for the  
500 first models of each NMR ensemble. The reference folded structure of (AAQAA)<sub>3</sub>, which  
501 is not available in the PDB, was taken from the work of Beauchamp et al.<sup>38</sup>. The final

502 folded (lowest-energy) structure from each simulation, together with the reference  
503 structures, are included in S1 File.

504

## 505 **Acknowledgments**

506 We are grateful to Dr. Sushil Kumar Mishra for useful discussions.

507

508

## 509 **References**

- 510 1. Saibil, H. Chaperone machines for protein folding, unfolding and disaggregation.  
511 *Nat. Rev. Mol. Cell Biol.* **14**, 630–642 (2013).
- 512 2. Alibolandi, M. & Mirzahoseini, H. Chemical assistance in refolding of bacterial  
513 inclusion bodies. *Biochem. Res. Int.* **2011**, 631607; 10.1155/2011/631607 (2011).
- 514 3. Javadi, Y., Fernandez, J. M. & Perez-Jimenez, R. Protein folding under mechanical  
515 forces: a physiological view. *Physiology* **28**, 9–17 (2013).
- 516 4. Valastyan, J. S. & Lindquist, S. Mechanisms of protein-folding diseases at a  
517 glance. *Dis. Model. Mech.* **7**, 9–14 (2014).
- 518 5. Muñoz, V. Conformational dynamics and ensembles in protein folding. *Annu. Rev.*  
519 *Biophys. Biomol. Struct.* **36**, 395–412 (2007).
- 520 6. Dill, K. A. & MacCallum, J. L. The protein-folding problem, 50 years on. *Science*  
521 **338**, 1042–1046 (2012).
- 522 7. Schwede, T. Protein modeling: what happened to the "protein structure gap"?

- 523            *Structure* **21**, 1531–1540 (2013).
- 524            8. Freddolino, P. L., Harrison, C. B., Liu, Y. & Schulten, K. Challenges in protein  
525            folding simulations: timescale, representation, and analysis. *Nat. Phys.* **6**, 751–758  
526            (2010).
- 527            9. Best, R. B. Atomistic molecular simulations of protein folding. *Curr. Opin. Struct.*  
528            *Biol.* **22**, 52–61 (2012).
- 529            10. Hyeon, C. & Thirumalai, D. Capturing the essence of folding and functions of  
530            biomolecules using coarse-grained models. *Nat. Commun.* **2**, 487;  
531            10.1038/ncomms1481 (2011).
- 532            11. Balaraman, G. S., Park, I.-H., Jain, A. & Vaidehi, N. Folding of small proteins  
533            using constrained molecular dynamics. *J. Phys. Chem. B* **115**, 7588–7596 (2011).
- 534            12. Mücksch, C. & Urbassek, H. M. Accelerating steered molecular dynamics: toward  
535            smaller velocities in forced unfolding simulations. *J. Chem. Theory Comput.* **12**,  
536            1380–1384 (2016).
- 537            13. Hao, G.-F., Xu, W.-F., Yang, S.-G. & Yang, G.-F. Multiple simulated annealing-  
538            molecular dynamics (MSA-MD) for conformational space search of peptide and  
539            miniprotein. *Sci. Rep.* **5**, 15568; 10.1038/srep15568 (2015).
- 540            14. Paquet, E. & Viktor, H. L. Molecular dynamics, Monte Carlo simulations, and  
541            Langevin dynamics: a computational review. *BioMed Res. Int.* **2015**, 183918;  
542            10.1155/2015/183918 (2015).
- 543            15. Jiang, F. & Wu, Y.-D. Folding of fourteen small proteins with a residue-specific  
544            force field and replica-exchange molecular dynamics. *J. Am. Chem. Soc.* **136**,

- 545           9536–9539 (2014).
- 546           16. Pande, V. S. *et al.* Atomistic protein folding simulations on the submillisecond time  
547           scale using worldwide distributed computing. *Biopolymers* **68**, 91–109 (2003).
- 548           17. Lindorff-Larsen, K., Piana, S., Dror, R. O. & Shaw, D. E. How fast-folding  
549           proteins fold. *Science* **334**, 517–520 (2011).
- 550           18. Lane, T. J., Shukla, D., Beauchamp, K. A. & Pande, V. S. To milliseconds and  
551           beyond: challenges in the simulation of protein folding. *Curr. Opin. Struct. Biol.*  
552           **23**, 58–65 (2013).
- 553           19. Piana, S., Klepeis, J. L. & Shaw, D. E. Assessing the accuracy of physical models  
554           used in protein-folding simulations: quantitative evidence from long molecular  
555           dynamics simulations. *Curr. Opin. Struct. Biol.* **24**, 98–105 (2014).
- 556           20. Lopes, P. E. M., Guvench, O. & MacKerell, A. D. Current status of protein force  
557           fields for molecular dynamics. *Methods Mol. Biol.* **1215**, 47–71 (2015).
- 558           21. Martín-García, F., Papaleo, E., Gomez-Puertas, P., Boomsma, W. & Lindorff-  
559           Larsen, K. Comparing molecular dynamics force fields in the essential subspace.  
560           *PLoS One* **10**, e0121114; 10.1371/journal.pone.0121114 (2015).
- 561           22. Lee, L. P., Cole, D. J., Skylaris, C. K., Jorgensen, W. L. & Payne, M. C. Polarized  
562           protein-specific charges from atoms-in-molecule electron density partitioning. *J.*  
563           *Chem. Theory Comput.* **9**, 2981–2991 (2013).
- 564           23. Dupradeau, F.-Y. *et al.* R.E.DD.B.: a database for RESP and ESP atomic charges,  
565           and force field libraries. *Nucleic Acids Res.* **36**, D360–D367 (2008).
- 566           24. Cole, D. J., Vilseck, J. Z., Tirado-Rives, J., Payne, M. C. & Jorgensen, W. L.

- 567 Biomolecular force field parameterization via atoms-in-molecule electron density  
568 partitioning. *J. Chem. Theory Comput.* **12**, 2312–2323 (2016).
- 569 25. Mayne, C. G., Saam, J., Schulten, K., Tajkhorshid, E. & Gumbart, J. C. Rapid  
570 parameterization of small molecules using the Force Field Toolkit. *J. Comput.*  
571 *Chem.* **34**, 2757–2770 (2013).
- 572 26. Mortier, W. J., Ghosh, S. K. & Shankar, S. Electronegativity-equalization method  
573 for the calculation of atomic charges in molecules. *J. Am. Chem. Soc.* **108**, 4315–  
574 4320 (1986).
- 575 27. Ionescu, C.-M., Geidl, S., Svobodova Vařeková, R. & Koča, J. Rapid calculation of  
576 accurate atomic charges for proteins via the electronegativity equalization method.  
577 *J. Chem. Inf. Model.* **53**, 2548–2558 (2013).
- 578 28. Lobanov, M. I., Bogatyreva, N. S. & Galzitskaia, O. V. Radius of gyration is  
579 indicator of compactness of protein structure. *Mol. Biol.* **42**, 701–706 (2008).
- 580 29. Neidigh, J. W., Fesinmeyer, R. M. & Andersen, N. H. Designing a 20-residue  
581 protein. *Nat. Struct. Biol.* **9**, 425–430 (2002).
- 582 30. Mou, L. *et al.* Folding simulation of Trp-cage utilizing a new AMBER compatible  
583 force field with coupled main chain torsions. *J. Theor. Comput. Chem.* **13**,  
584 1450026; 10.1142/S0219633614500266 (2014).
- 585 31. Culik, R. M., Serrano, A. L., Bunagan, M. R. & Gai, F. Achieving secondary  
586 structural resolution in kinetic measurements of protein folding: a case study of the  
587 folding mechanism of Trp-cage. *Angew. Chem. Int. Ed. Engl.* **50**, 10884–10887  
588 (2011).

- 589 32. Zhou, R. Trp-cage: folding free energy landscape in explicit water. *Proc. Natl.*  
590 *Acad. Sci. U.S.A.* **100**, 13280–13285 (2003).
- 591 33. Barua, B. *et al.* The Trp-cage: optimizing the stability of a globular miniprotein.  
592 *Protein Eng. Des. Sel.* **21**, 171–185 (2008).
- 593 34. Hu, Z., Tang, Y., Wang, H., Zhang, X. & Lei, M. Dynamics and cooperativity of  
594 Trp-cage folding. *Arch. Biochem. Biophys.* **475**, 140–147 (2008).
- 595 35. Neuweiler, H., Doose, S. & Sauer, M. A microscopic view of miniprotein folding:  
596 enhanced folding efficiency through formation of an intermediate. *Proc. Natl.*  
597 *Acad. Sci. U.S.A.* **102**, 16650–16655 (2005).
- 598 36. Jimenez-Cruz, C. A., Makhatadze, G. I. & Garcia, A. E. Protonation/deprotonation  
599 effects on the stability of the Trp-cage miniprotein. *Phys. Chem. Chem. Phys.* **13**,  
600 17056–17063 (2011).
- 601 37. Byrne, A. *et al.* Folding dynamics and pathways of the trp-cage miniproteins.  
602 *Biochemistry* **53**, 6011–6021 (2014).
- 603 38. Kannan, S. & Zacharias, M. Role of tryptophan side chain dynamics on the Trp-  
604 cage mini-protein folding studied by molecular dynamics simulations. *PLoS One* **9**,  
605 e88383; 10.1371/journal.pone.0088383 (2014).
- 606 39. Hamley, I. W. The amyloid beta peptide: a chemist's perspective. Role in  
607 Alzheimer's and fibrillization. *Chem. Rev.* **112**, 5147–5192 (2012).
- 608 40. Fonar, G. & Samson, A. O. NMR structure of the water soluble A $\beta$ 17-34 peptide.  
609 *Biosci. Rep.* **34**, e00155; 10.1042/BSR20140094 (2014).
- 610 41. Baumketner, A. *et al.* Structure of the 21-30 fragment of amyloid beta-protein.

- 611            *Protein Sci.* **15**, 1239–1247 (2006).
- 612            42. Marqusee, S., Robbins, V. H. & Baldwin, R. L. Unusually stable helix formation in  
613            short alanine-based peptides. *Proc. Natl. Acad. Sci. U.S.A.* **86**, 5286–5290 (1989).
- 614            43. Shalongo, W., Dugad, L. & Stellwagen, E. Distribution of helicity within the model  
615            peptide acetyl(AAQAA)<sub>3</sub> amide. *J. Am. Chem. Soc.* **116**, 8288–8293 (1994).
- 616            44. Huang, J. & MacKerell, A. D. Jr. Induction of peptide bond dipoles drives  
617            cooperative helix formation in the (AAQAA)<sub>3</sub> peptide. *Biophys. J.* **107**, 991–997  
618            (2014).
- 619            45. Vila, J. A., Ripoll, D. R. & Scheraga, H. A. Physical reasons for the unusual  $\alpha$ -helix  
620            stabilization afforded by charged or neutral polar residues in alanine-rich peptides.  
621            *Proc. Natl. Acad. Sci. U.S.A.* **97**, 13075–13079 (2000).
- 622            46. Feig, M., Karanicolas, J. & Brooks, C. L. 3rd. MMTSB Tool Set: enhanced  
623            sampling and multiscale modeling methods for applications in structural biology. *J.*  
624            *Mol. Graph. Model.* **22**, 377–395 (2004).
- 625            47. Beauchamp, K. A., Lin, Y.-S., Das, R. & Pande, V. S. Are protein force fields  
626            getting better? A systematic benchmark on 524 diverse NMR measurements. *J.*  
627            *Chem. Theory Comput.* **8**, 1409–1414 (2012).
- 628            48. Shirley, W. A. & Brooks, C. L. 3rd. Curious structure in "canonical" alanine-based  
629            peptides. *Proteins* **28**, 59–71 (1997).
- 630            49. Wang, H., Varady, J., Ng, L. & Sung, S. S. Molecular dynamics simulations of  $\beta$ -  
631            hairpin folding. *Proteins* **37**, 325–333 (1999).
- 632            50. Gasteiger, J. & Marsili, M. A new model for calculating atomic charges in

- 633 molecules. *Tetrahedron Lett.* **19**, 3181–3184 (1978).
- 634 51. O’Boyle, N. M. *et al.* Open Babel: an open chemical toolbox. *J. Cheminf.* **3**, 33;  
635 10.1186/1758-2946-3-33 (2011).
- 636 52. Jang, S., Shin, S. & Pak, Y. Replica-exchange method using the generalized  
637 effective potential. *Phys. Rev. Lett.* **91**, 058305; 10.1103/PhysRevLett.91.058305  
638 (2003).
- 639 53. Best, R. B. & Hummer, G. Optimized molecular dynamics force fields applied to  
640 the helix-coil transition of polypeptides. *J. Phys. Chem. B* **113**, 9004–9015 (2009).
- 641 54. Aliev, A. E. *et al.* Motional timescale predictions by molecular dynamics  
642 simulations: case study using proline and hydroxyproline sidechain dynamics.  
643 *Proteins* **82**, 195–215 (2014).
- 644 55. Snow, C. D. *et al.* Trp zipper folding kinetics by molecular dynamics and  
645 temperature-jump spectroscopy. *Proc. Natl. Acad. Sci. U.S.A.* **101**, 4077–4082  
646 (2004).
- 647 56. Xu, W., Yang, Y., Mu, Y. & Nordenskiöld, L. Global optimisation by replica  
648 exchange with scaled hybrid Hamiltonians. *Mol. Simul.* **34**, 575;  
649 10.1080/08927020801947020 (2008).
- 650 57. Noy, K., Kalisman, N. & Keasar, C. Prediction of structural stability of short beta-  
651 hairpin peptides by molecular dynamics and knowledge-based potentials. *BMC*  
652 *Struct. Biol.* **8**, 27; 10.1186/1472-6807-8-27 (2008).
- 653 58. Kannan, S. & Zacharias, M. Folding simulations of Trp-cage mini protein in  
654 explicit solvent using biasing potential replica-exchange molecular dynamics



- 655 simulations. *Proteins* **76**, 448–460 (2009).
- 656 59. Kannan, S. & Zacharias, M. Folding simulations of Trp-cage mini protein using  
657 temperature and biasing potential replica-exchange molecular dynamics  
658 simulations. *Int. J. Mol. Sci.* **10**, 1121–1137 (2009).
- 659 60. Lee, M., Yoon, J., Jang, S. & Shin, S. Conformational sampling of metastable  
660 states: Tq-REM as a novel replica exchange method. *Phys. Chem. Chem. Phys.* **19**,  
661 5454; 10.1039/c6cp05322j (2017).
- 662 61. Lindorff-Larsen, K. et al. Systematic validation of protein force fields against  
663 experimental data. *PLoS One* **7**, e32131; 10.1371/journal.pone.0032131 (2012).
- 664 62. Thévenet, P. et al. PEP-FOLD: an updated de novo structure prediction server for  
665 both linear and disulfide bonded cyclic peptides. *Nucleic Acids Res.* **40**, W288–  
666 W293; 10.1093/nar/gks419 (2012).
- 667 63. Pronk, S. et al. GROMACS 4.5: a high-throughput and highly parallel open source  
668 molecular simulation toolkit. *Bioinformatics* **29**, 845–854 (2013).
- 669 64. Case, D. A. et al. The Amber biomolecular simulation programs. *J. Comput. Chem.*  
670 **26**, 1668–1688 (2005).
- 671 65. Ponder, J. W. & Case, D. A. Force fields for protein simulations. *Adv. Protein*  
672 *Chem.* **66**, 27–85 (2003).
- 673 66. Hess, B. P-LINCS: a parallel linear constraint solver for molecular simulation. *J.*  
674 *Chem. Theory Comput.* **4**, 116–122 (2008).
- 675 67. Essmann, U., Perera, L. & Berkowitz, M. L. A smooth particle mesh Ewald  
676 method. *J. Chem. Phys.* **103**, 8577–8593 (1995).

- 677 68. Bussi, G., Donadio, D. & Parrinello, M. Canonical sampling through velocity  
678 rescaling. *J. Chem. Phys.* **126**, 014101; 10.1063/1.2408420 (2007).
- 679 69. Parrinello, M. & Rahman, A. Polymorphic transitions in single crystals: a new  
680 molecular dynamics method. *J. Appl. Phys.* **52**, 7182–7190 (1981).
- 681 70. Kabsch, W. & Sander, C. Dictionary of protein secondary structure: pattern  
682 recognition of hydrogen-bonded and geometrical features. *Biopolymers* **22**, 2577–  
683 2637 (1983).
- 684 71. Ionescu, C.-M. *et al.* AtomicChargeCalculator: interactive web-based calculation of  
685 atomic charges in large biomolecular complexes and drug-like molecules. *J.*  
686 *Cheminform.* **7**, 50; 10.1186/s13321-015-0099-x (2015).

687

688
